# Supplementary material for: Cervical intraepithelial neoplasia in women with transformation zone type 3: cervical biopsy versus large loop excision
Source: PubMed Central journal article supplement (PMC9796102; doi:10.1111/1471-0528.17200), 2022-05-26
Supplement: BJO-129-2132-s005.pdf [file BJO-129-2132-s005.pdf]

## ICMJE DISCLOSURE FORM

**Date:** 2/15/2022

**Your Name:** Line Winther Gustafson

**Manuscript Title:** The clinical utility of biopsies and diagnostic large loop excision of the transformation zone in women with transformation zone type 3: a cross-sectional study

**Manuscript Number (if known):** Manuscript ID BJOG-21-1804

In the interest of transparency, we ask you to disclose all relationships/activities/interests listed below that are related to the content of your manuscript. "Related" means any relation with for-profit or not-for-profit third parties whose interests may be affected by the content of the manuscript. Disclosure represents a commitment to transparency and does not necessarily indicate a bias. If you are in doubt about whether to list a relationship/activity/interest, it is preferable that you do so.

The author's relationships/activities/interests should be defined broadly. For example, if your manuscript pertains to the epidemiology of hypertension, you should declare all relationships with manufacturers of antihypertensive medication, even if that medication is not mentioned in the manuscript.

In item #1 below, report all support for the work reported in this manuscript without time limit. For all other items, the time frame for disclosure is the past 36 months.

|                                                                                                                                                            |                                                                                                                                                                                | Name all entities with whom you have this relationship or indicate none (add rows as needed) | Specifications/Comments (e.g., if payments were made to you or to your institution)                                                                                                                                                                                                                                                                                                                                                                                                                                                                                                                                                                                                       |                                                                                                                                           |                                               |                                                                                                                                                            |                                                       |                                           |  |
|------------------------------------------------------------------------------------------------------------------------------------------------------------|--------------------------------------------------------------------------------------------------------------------------------------------------------------------------------|----------------------------------------------------------------------------------------------|-------------------------------------------------------------------------------------------------------------------------------------------------------------------------------------------------------------------------------------------------------------------------------------------------------------------------------------------------------------------------------------------------------------------------------------------------------------------------------------------------------------------------------------------------------------------------------------------------------------------------------------------------------------------------------------------|-------------------------------------------------------------------------------------------------------------------------------------------|-----------------------------------------------|------------------------------------------------------------------------------------------------------------------------------------------------------------|-------------------------------------------------------|-------------------------------------------|--|
| <b>Time frame: Since the initial planning of the work</b>                                                                                                  |                                                                                                                                                                                |                                                                                              |                                                                                                                                                                                                                                                                                                                                                                                                                                                                                                                                                                                                                                                                                           |                                                                                                                                           |                                               |                                                                                                                                                            |                                                       |                                           |  |
| <b>1</b>                                                                                                                                                   | All support for the present manuscript (e.g., funding, provision of study materials, medical writing, article processing charges, etc.)<br><b>No time limit for this item.</b> | <input type="checkbox"/> <b>None</b>                                                         | <table border="1" style="width: 100%; border-collapse: collapse;"> <tr> <td style="width: 60%;">This study was supported by a grant from the Health Research Foundation of Central Denmark Region (A3234) and Dagmar Marshalls Foundation</td> <td>Salary for PhD Student Line Winther Gustafson</td> </tr> <tr> <td>This study was supported by a grant from, A.P. Moller Foundation, Else and Mogens Wedell-Wedellsborgs Foundation and Fabricant Einar Willumsens Mindelegat</td> <td>Running cost for Line Winther Gustafson's PhD project</td> </tr> <tr> <td colspan="2" style="text-align: right; font-size: small;">Click the tab key to add additional rows.</td> </tr> </table> | This study was supported by a grant from the Health Research Foundation of Central Denmark Region (A3234) and Dagmar Marshalls Foundation | Salary for PhD Student Line Winther Gustafson | This study was supported by a grant from, A.P. Moller Foundation, Else and Mogens Wedell-Wedellsborgs Foundation and Fabricant Einar Willumsens Mindelegat | Running cost for Line Winther Gustafson's PhD project | Click the tab key to add additional rows. |  |
| This study was supported by a grant from the Health Research Foundation of Central Denmark Region (A3234) and Dagmar Marshalls Foundation                  | Salary for PhD Student Line Winther Gustafson                                                                                                                                  |                                                                                              |                                                                                                                                                                                                                                                                                                                                                                                                                                                                                                                                                                                                                                                                                           |                                                                                                                                           |                                               |                                                                                                                                                            |                                                       |                                           |  |
| This study was supported by a grant from, A.P. Moller Foundation, Else and Mogens Wedell-Wedellsborgs Foundation and Fabricant Einar Willumsens Mindelegat | Running cost for Line Winther Gustafson's PhD project                                                                                                                          |                                                                                              |                                                                                                                                                                                                                                                                                                                                                                                                                                                                                                                                                                                                                                                                                           |                                                                                                                                           |                                               |                                                                                                                                                            |                                                       |                                           |  |
| Click the tab key to add additional rows.                                                                                                                  |                                                                                                                                                                                |                                                                                              |                                                                                                                                                                                                                                                                                                                                                                                                                                                                                                                                                                                                                                                                                           |                                                                                                                                           |                                               |                                                                                                                                                            |                                                       |                                           |  |
| <b>Time frame: past 36 months</b>                                                                                                                          |                                                                                                                                                                                |                                                                                              |                                                                                                                                                                                                                                                                                                                                                                                                                                                                                                                                                                                                                                                                                           |                                                                                                                                           |                                               |                                                                                                                                                            |                                                       |                                           |  |
| <b>2</b>                                                                                                                                                   | Grants or contracts from any entity (if not indicated in item #1 above).                                                                                                       | <input checked="" type="checkbox"/> <b>None</b>                                              | <table border="1" style="width: 100%; border-collapse: collapse; height: 40px;"> <tr><td style="width: 60%;"></td><td></td></tr> <tr><td></td><td></td></tr> <tr><td></td><td></td></tr> </table>                                                                                                                                                                                                                                                                                                                                                                                                                                                                                         |                                                                                                                                           |                                               |                                                                                                                                                            |                                                       |                                           |  |
|                                                                                                                                                            |                                                                                                                                                                                |                                                                                              |                                                                                                                                                                                                                                                                                                                                                                                                                                                                                                                                                                                                                                                                                           |                                                                                                                                           |                                               |                                                                                                                                                            |                                                       |                                           |  |
|                                                                                                                                                            |                                                                                                                                                                                |                                                                                              |                                                                                                                                                                                                                                                                                                                                                                                                                                                                                                                                                                                                                                                                                           |                                                                                                                                           |                                               |                                                                                                                                                            |                                                       |                                           |  |
|                                                                                                                                                            |                                                                                                                                                                                |                                                                                              |                                                                                                                                                                                                                                                                                                                                                                                                                                                                                                                                                                                                                                                                                           |                                                                                                                                           |                                               |                                                                                                                                                            |                                                       |                                           |  |
| <b>3</b>                                                                                                                                                   | Royalties or licenses                                                                                                                                                          | <input checked="" type="checkbox"/> <b>None</b>                                              | <table border="1" style="width: 100%; border-collapse: collapse; height: 40px;"> <tr><td style="width: 60%;"></td><td></td></tr> <tr><td></td><td></td></tr> <tr><td></td><td></td></tr> </table>                                                                                                                                                                                                                                                                                                                                                                                                                                                                                         |                                                                                                                                           |                                               |                                                                                                                                                            |                                                       |                                           |  |
|                                                                                                                                                            |                                                                                                                                                                                |                                                                                              |                                                                                                                                                                                                                                                                                                                                                                                                                                                                                                                                                                                                                                                                                           |                                                                                                                                           |                                               |                                                                                                                                                            |                                                       |                                           |  |
|                                                                                                                                                            |                                                                                                                                                                                |                                                                                              |                                                                                                                                                                                                                                                                                                                                                                                                                                                                                                                                                                                                                                                                                           |                                                                                                                                           |                                               |                                                                                                                                                            |                                                       |                                           |  |
|                                                                                                                                                            |                                                                                                                                                                                |                                                                                              |                                                                                                                                                                                                                                                                                                                                                                                                                                                                                                                                                                                                                                                                                           |                                                                                                                                           |                                               |                                                                                                                                                            |                                                       |                                           |  |

|                                    |                                                                                                              | Name all entities with whom you have this relationship or indicate none (add rows as needed)                                                                                                                                                                                      | Specifications/Comments (e.g., if payments were made to you or to your institution) |                                                                                                 |  |  |  |  |  |
|------------------------------------|--------------------------------------------------------------------------------------------------------------|-----------------------------------------------------------------------------------------------------------------------------------------------------------------------------------------------------------------------------------------------------------------------------------|-------------------------------------------------------------------------------------|-------------------------------------------------------------------------------------------------|--|--|--|--|--|
| 4                                  | Consulting fees                                                                                              | <input checked="" type="checkbox"/> None<br><br><table border="1"><tr><td></td><td></td></tr><tr><td></td><td></td></tr><tr><td></td><td></td></tr></table>                                                                                                                       |                                                                                     |                                                                                                 |  |  |  |  |  |
|                                    |                                                                                                              |                                                                                                                                                                                                                                                                                   |                                                                                     |                                                                                                 |  |  |  |  |  |
|                                    |                                                                                                              |                                                                                                                                                                                                                                                                                   |                                                                                     |                                                                                                 |  |  |  |  |  |
|                                    |                                                                                                              |                                                                                                                                                                                                                                                                                   |                                                                                     |                                                                                                 |  |  |  |  |  |
| 5                                  | Payment or honoraria for lectures, presentations, speakers bureaus, manuscript writing or educational events | <input type="checkbox"/> None<br><br><table border="1"><tr><td>Astra Zeneca</td><td>Line W. Gustafson has received speaker's fee from Astra Zeneca</td></tr><tr><td></td><td></td></tr><tr><td></td><td></td></tr></table>                                                        | Astra Zeneca                                                                        | Line W. Gustafson has received speaker's fee from Astra Zeneca                                  |  |  |  |  |  |
| Astra Zeneca                       | Line W. Gustafson has received speaker's fee from Astra Zeneca                                               |                                                                                                                                                                                                                                                                                   |                                                                                     |                                                                                                 |  |  |  |  |  |
|                                    |                                                                                                              |                                                                                                                                                                                                                                                                                   |                                                                                     |                                                                                                 |  |  |  |  |  |
|                                    |                                                                                                              |                                                                                                                                                                                                                                                                                   |                                                                                     |                                                                                                 |  |  |  |  |  |
| 6                                  | Payment for expert testimony                                                                                 | <input checked="" type="checkbox"/> None<br><br><table border="1"><tr><td></td><td></td></tr><tr><td></td><td></td></tr><tr><td></td><td></td></tr></table>                                                                                                                       |                                                                                     |                                                                                                 |  |  |  |  |  |
|                                    |                                                                                                              |                                                                                                                                                                                                                                                                                   |                                                                                     |                                                                                                 |  |  |  |  |  |
|                                    |                                                                                                              |                                                                                                                                                                                                                                                                                   |                                                                                     |                                                                                                 |  |  |  |  |  |
|                                    |                                                                                                              |                                                                                                                                                                                                                                                                                   |                                                                                     |                                                                                                 |  |  |  |  |  |
| 7                                  | Support for attending meetings and/or travel                                                                 | <input type="checkbox"/> None<br><br><table border="1"><tr><td>Danish Cancer Society travel grant</td><td>The purpose of the travel was to visit dr. Nicolas Wentzensen at National Cancer Institute, US.</td></tr><tr><td></td><td></td></tr><tr><td></td><td></td></tr></table> | Danish Cancer Society travel grant                                                  | The purpose of the travel was to visit dr. Nicolas Wentzensen at National Cancer Institute, US. |  |  |  |  |  |
| Danish Cancer Society travel grant | The purpose of the travel was to visit dr. Nicolas Wentzensen at National Cancer Institute, US.              |                                                                                                                                                                                                                                                                                   |                                                                                     |                                                                                                 |  |  |  |  |  |
|                                    |                                                                                                              |                                                                                                                                                                                                                                                                                   |                                                                                     |                                                                                                 |  |  |  |  |  |
|                                    |                                                                                                              |                                                                                                                                                                                                                                                                                   |                                                                                     |                                                                                                 |  |  |  |  |  |
| 8                                  | Patents planned, issued or pending                                                                           | <input checked="" type="checkbox"/> None<br><br><table border="1"><tr><td></td><td></td></tr><tr><td></td><td></td></tr><tr><td></td><td></td></tr></table>                                                                                                                       |                                                                                     |                                                                                                 |  |  |  |  |  |
|                                    |                                                                                                              |                                                                                                                                                                                                                                                                                   |                                                                                     |                                                                                                 |  |  |  |  |  |
|                                    |                                                                                                              |                                                                                                                                                                                                                                                                                   |                                                                                     |                                                                                                 |  |  |  |  |  |
|                                    |                                                                                                              |                                                                                                                                                                                                                                                                                   |                                                                                     |                                                                                                 |  |  |  |  |  |
| 9                                  | Participation on a Data Safety Monitoring Board or Advisory Board                                            | <input checked="" type="checkbox"/> None<br><br><table border="1"><tr><td></td><td></td></tr><tr><td></td><td></td></tr><tr><td></td><td></td></tr></table>                                                                                                                       |                                                                                     |                                                                                                 |  |  |  |  |  |
|                                    |                                                                                                              |                                                                                                                                                                                                                                                                                   |                                                                                     |                                                                                                 |  |  |  |  |  |
|                                    |                                                                                                              |                                                                                                                                                                                                                                                                                   |                                                                                     |                                                                                                 |  |  |  |  |  |
|                                    |                                                                                                              |                                                                                                                                                                                                                                                                                   |                                                                                     |                                                                                                 |  |  |  |  |  |
| 10                                 | Leadership or fiduciary role in other board, society, committee or advocacy group, paid or unpaid            | <input checked="" type="checkbox"/> None<br><br><table border="1"><tr><td></td><td></td></tr><tr><td></td><td></td></tr><tr><td></td><td></td></tr></table>                                                                                                                       |                                                                                     |                                                                                                 |  |  |  |  |  |
|                                    |                                                                                                              |                                                                                                                                                                                                                                                                                   |                                                                                     |                                                                                                 |  |  |  |  |  |
|                                    |                                                                                                              |                                                                                                                                                                                                                                                                                   |                                                                                     |                                                                                                 |  |  |  |  |  |
|                                    |                                                                                                              |                                                                                                                                                                                                                                                                                   |                                                                                     |                                                                                                 |  |  |  |  |  |

|    |                                                                                  | Name all entities with whom you have this relationship or indicate none (add rows as needed) | Specifications/Comments (e.g., if payments were made to you or to your institution)                                 |
|----|----------------------------------------------------------------------------------|----------------------------------------------------------------------------------------------|---------------------------------------------------------------------------------------------------------------------|
| 11 | Stock or stock options                                                           | <input checked="" type="checkbox"/> None                                                     |                                                                                                                     |
|    |                                                                                  |                                                                                              |                                                                                                                     |
|    |                                                                                  |                                                                                              |                                                                                                                     |
|    |                                                                                  |                                                                                              |                                                                                                                     |
| 12 | Receipt of equipment, materials, drugs, medical writing, gifts or other services | <input type="checkbox"/> None                                                                |                                                                                                                     |
|    |                                                                                  | Roche Diagnostics.                                                                           | Line Winther Gustafson is participating in other studies with HPV test kits and CINTec plus kits sponsored by Roche |
|    |                                                                                  |                                                                                              |                                                                                                                     |
|    |                                                                                  |                                                                                              |                                                                                                                     |
| 13 | Other financial or non-financial interests                                       | <input checked="" type="checkbox"/> None                                                     |                                                                                                                     |
|    |                                                                                  |                                                                                              |                                                                                                                     |
|    |                                                                                  |                                                                                              |                                                                                                                     |
|    |                                                                                  |                                                                                              |                                                                                                                     |

Please place an "X" next to the following statement to indicate your agreement:

I certify that I have answered every question and have not altered the wording of any of the questions on this form.
